# Supplementary material
Source: PubMed Central journal article supplement (PMC8384128)

# Supplementary Figure 1

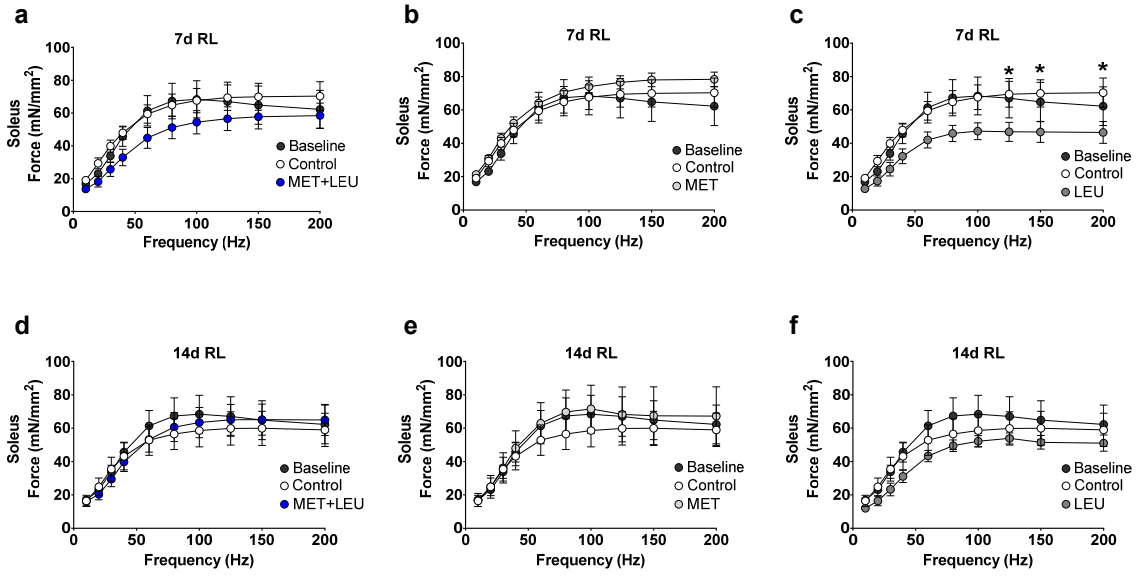

Supplement: NIHMS1731115-supplement-fS1.pdf [file NIHMS1731115-supplement-fS1.pdf]

# Supplementary Figure 2

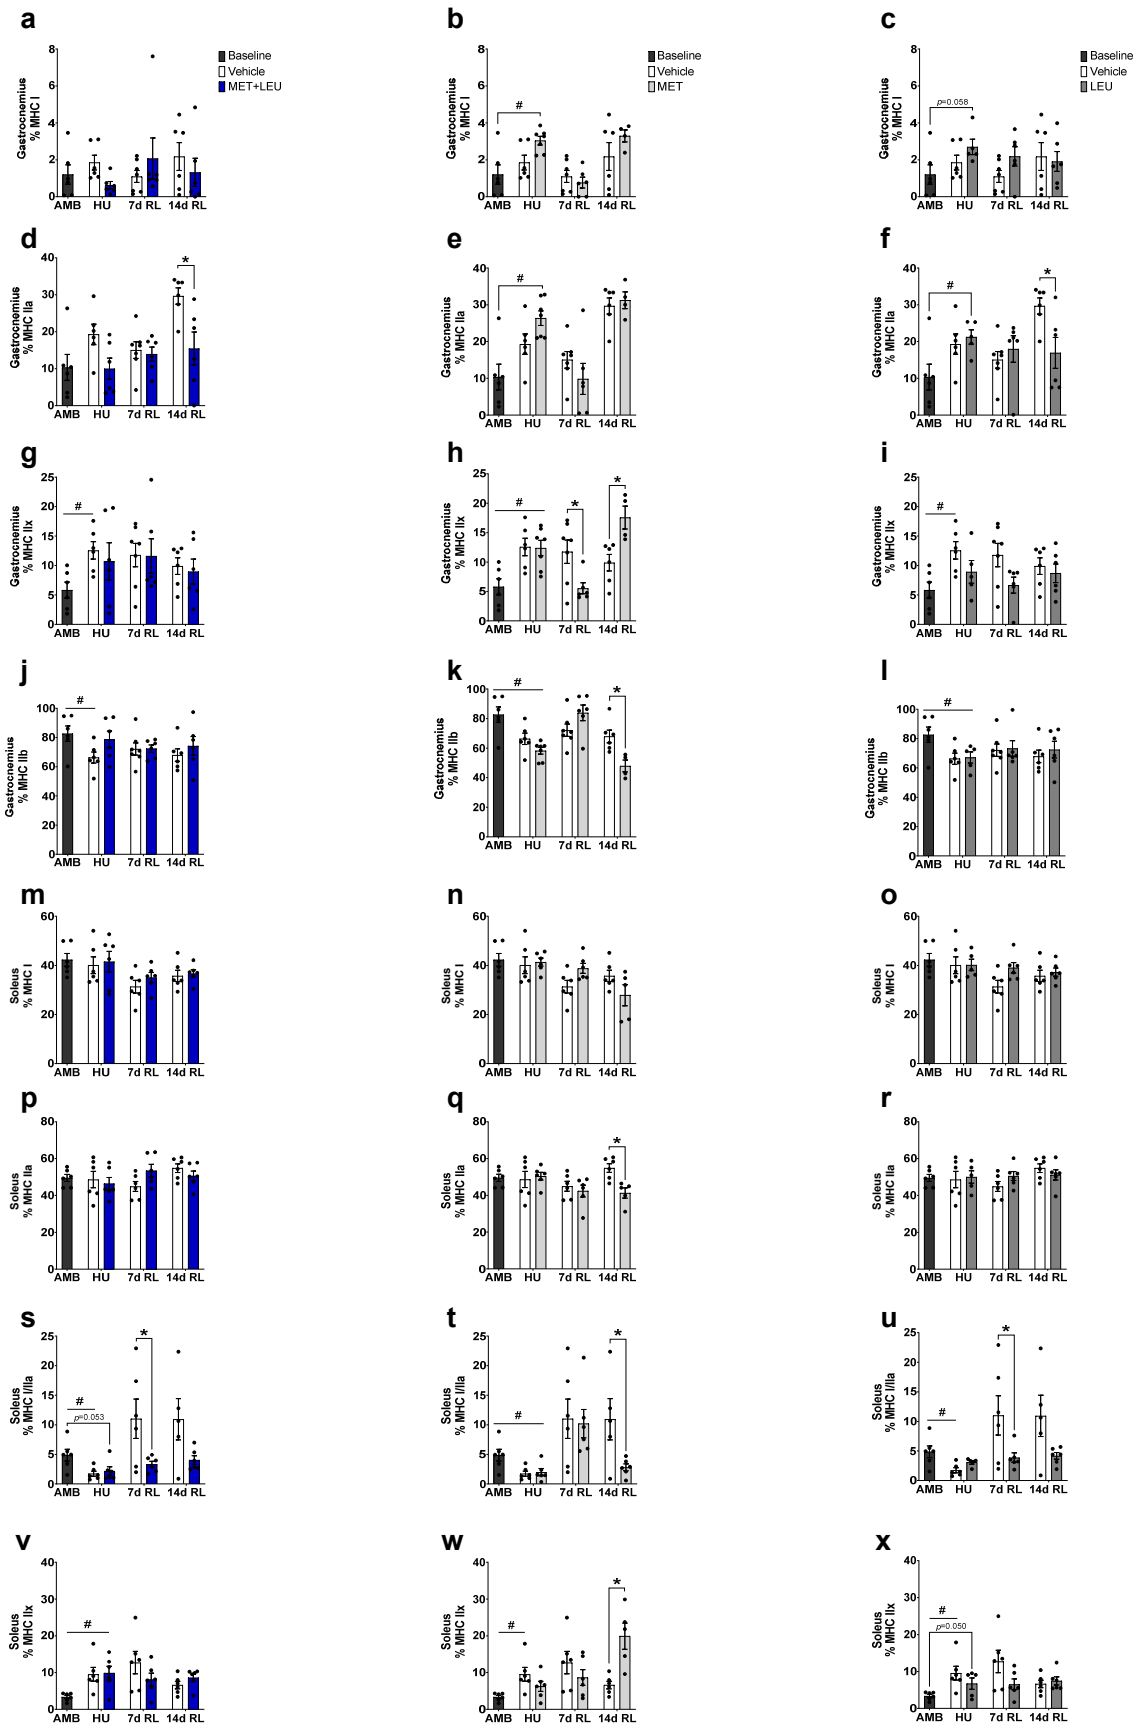

Supplement: NIHMS1731115-supplement-fS2.pdf [file NIHMS1731115-supplement-fS2.pdf]

Supplementary Figure 3

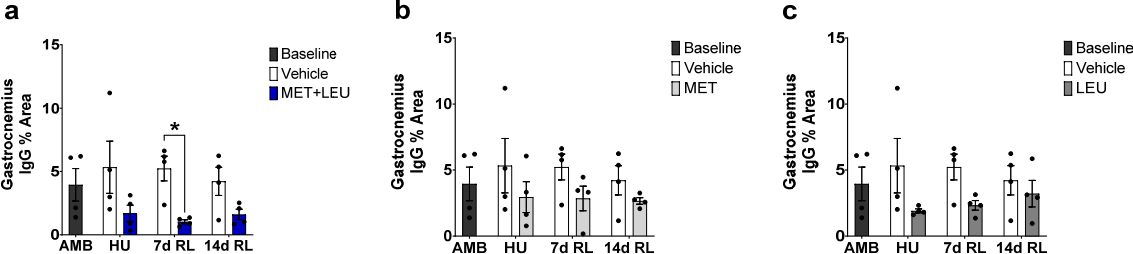

**d** Gastrocnemius

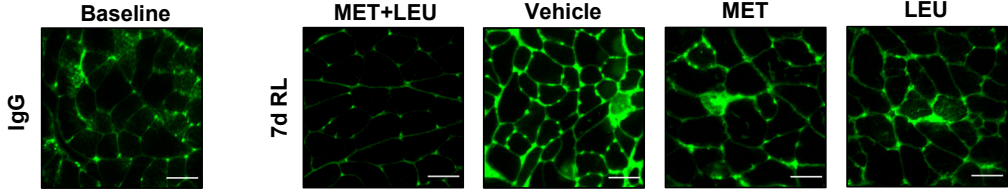

Supplement: NIHMS1731115-supplement-fS3.pdf [file NIHMS1731115-supplement-fS3.pdf]

# Supplementary Figure 4

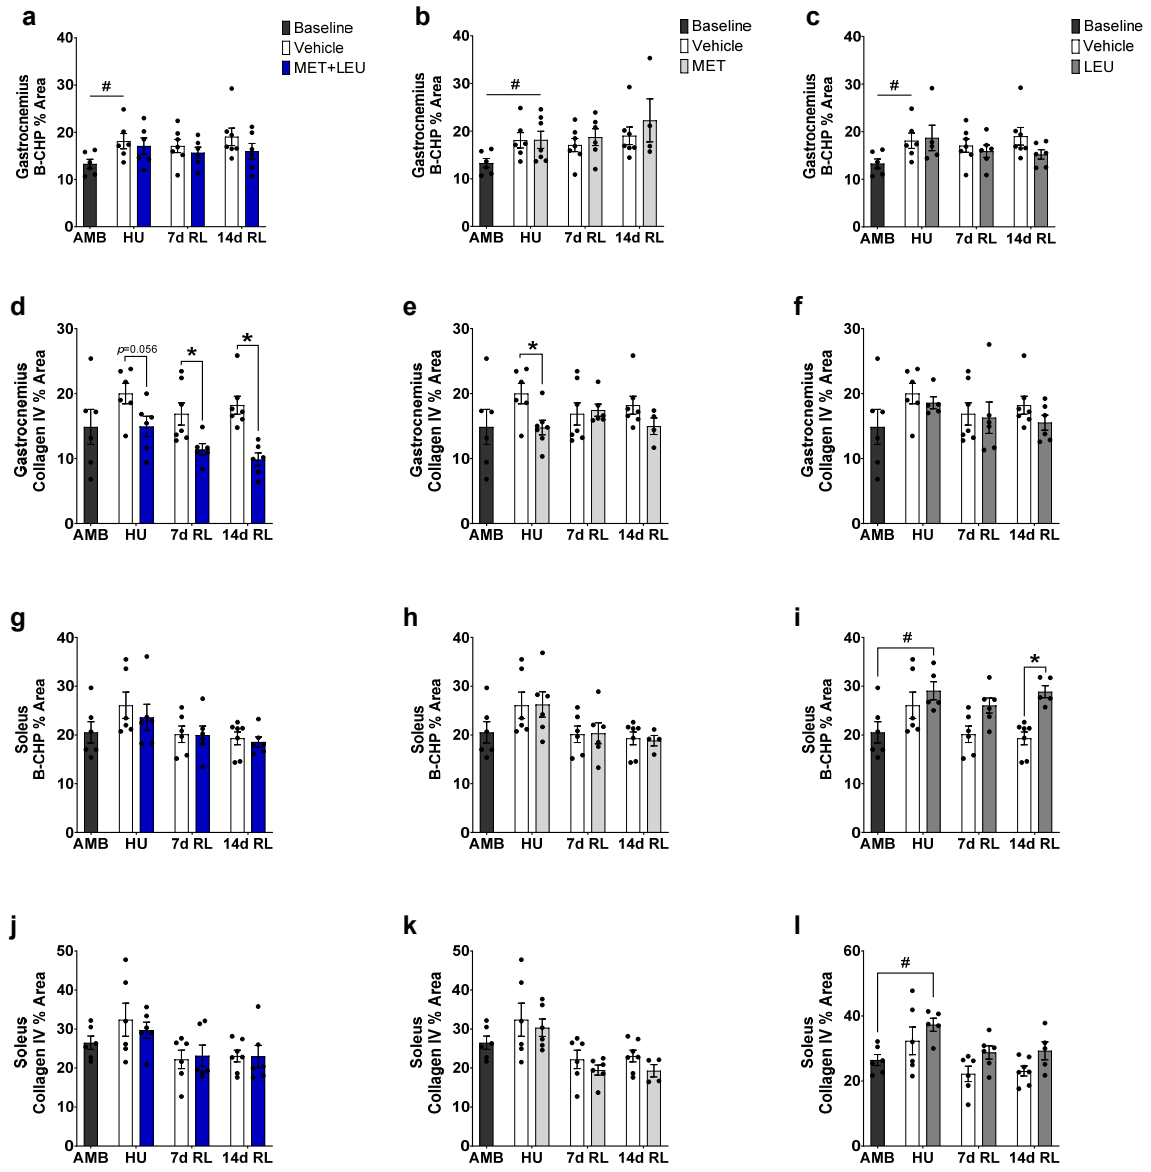

Supplement: NIHMS1731115-supplement-fS4.pdf [file NIHMS1731115-supplement-fS4.pdf]

**Supplementary Figure 5**

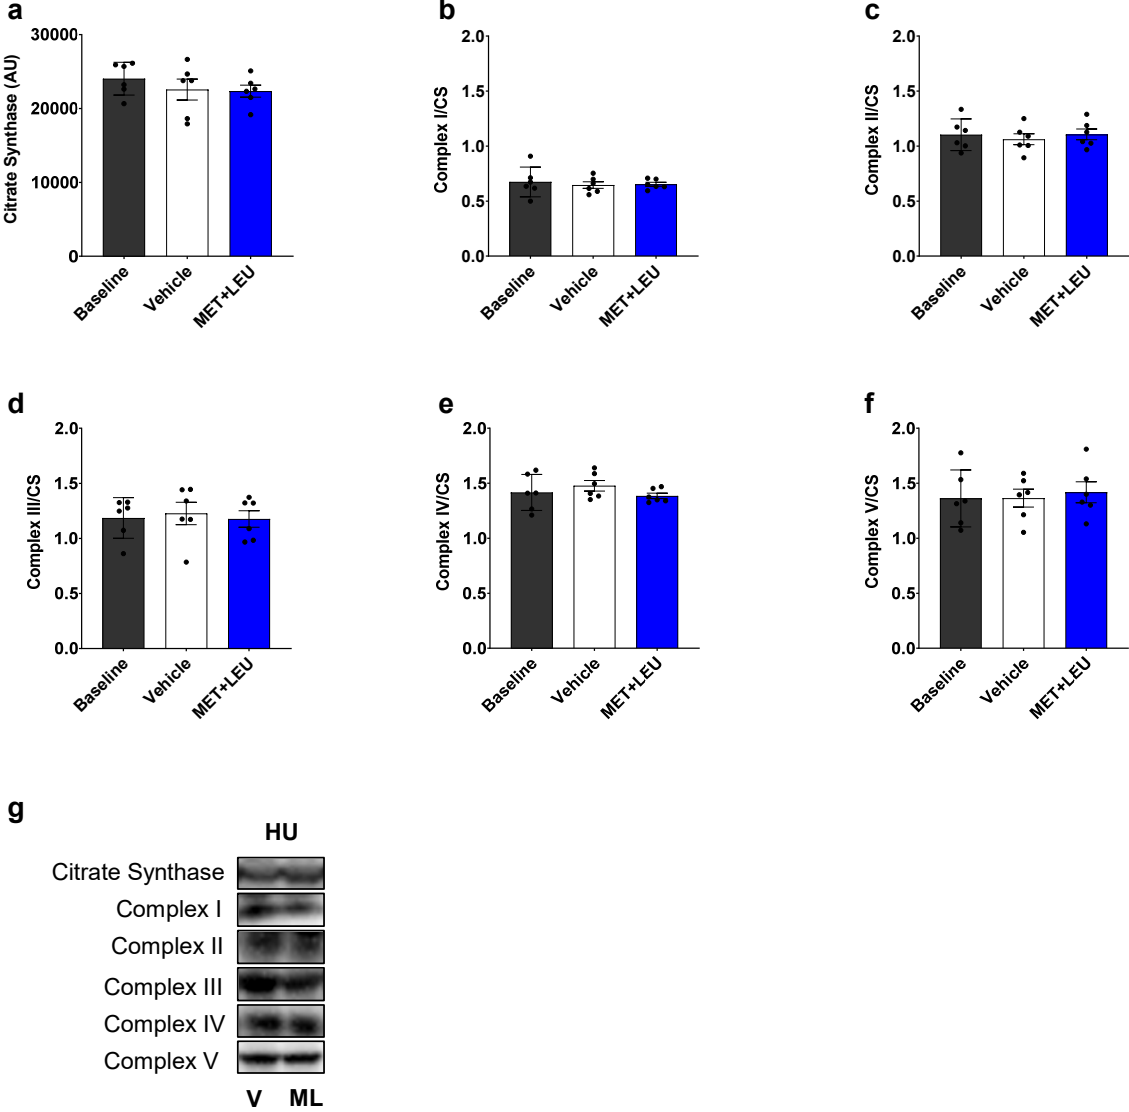

Supplement: NIHMS1731115-supplement-fS5.pdf [file NIHMS1731115-supplement-fS5.pdf]
